# Supplementary material for: Implementation of a referral and expert advice call Center for Maternal and Newborn Care in the resource constrained health system context of the Greater Accra region of Ghana
Source: PubMed Central journal article supplement (PMC7807452; doi:10.1186/s12884-020-03534-2), 2021-01-13
Supplement: 12884_2020_3534_MOESM1_ESM.pdf [file 12884_2020_3534_MOESM1_ESM.pdf]

## GAR/GHS EMERGENCY REFERRAL AND COORDINATION CENTRE

|                                                                                         |                                                                                              |                 |
|-----------------------------------------------------------------------------------------|----------------------------------------------------------------------------------------------|-----------------|
| Date(dd/mm/yy):                                                                         | Time of call: (24hr)                                                                         | Serial No.:     |
| Health Facility Calling:                                                                |                                                                                              | District:       |
| Name of staff calling:                                                                  |                                                                                              | Cadre:          |
| Phone number:                                                                           |                                                                                              |                 |
| <b>Request Type</b>                                                                     |                                                                                              |                 |
| Referral:<br>a) Obstetrics / Gynaecology<br>b) Paediatrics<br>c) Medical<br>d) Surgical | Expert Advice:<br>a) Obstetrics / Gynaecology<br>b) Paediatrics<br>c) Medical<br>d) Surgical | Other Requests: |
| Reason for request:                                                                     |                                                                                              |                 |
| If referral, ambulance needed?                                                          | a) Yes                                                                                       | b) No           |

### IMMEDIATE FOLLOW-UP FEEDBACK:

|                                                             |                                |                                              |                                                             |
|-------------------------------------------------------------|--------------------------------|----------------------------------------------|-------------------------------------------------------------|
| <b>Receiving referral facility:</b>                         |                                |                                              |                                                             |
| Contact at facility:                                        |                                | Time call placed:                            |                                                             |
| Time National Ambulance Service called:                     |                                | Time bed secured:                            |                                                             |
| <b>Feedback to facility initiating call</b>                 |                                |                                              |                                                             |
| Facility<br>1. Time call placed:<br>2. Contact at facility: | Bed secured<br>1. Yes<br>2. No | Ambulance secured<br>1. Yes<br>2. No(reason) | Expert Advice<br>1. Expert contacted<br>2. Patient referred |

### LATE FOLLOW-UP FEEDBACK

|                                                       |                     |         |            |
|-------------------------------------------------------|---------------------|---------|------------|
| <b>Feedback from facility initiating call</b>         |                     |         |            |
| State of patient on arrival                           |                     |         |            |
| 1. Alive                                              | 2. Alive but morbid | 3. Dead | 4. Unknown |
| Comments:                                             |                     |         |            |
| <b>Comment by Triage Officer on referral process:</b> |                     |         |            |
